# Short telomeres in alveolar type II cells associate with lung fibrosis in post COVID-19 patients with cancer

Paula Martínez<sup>1</sup>, Raúl Sánchez-Vazquez<sup>1</sup>, Arpita Saha<sup>1</sup>, Maria S. Rodriguez-Duque<sup>2,6</sup>  
Sara Naranjo-Gonzalo<sup>3</sup>, Joy S. Osorio-Chavez<sup>4</sup>, Ana V. Villar-Ramos<sup>5,6,7</sup>, Maria A. Blasco<sup>1</sup>

<sup>1</sup>Telomeres and Telomerase Group, Molecular Oncology Program, Spanish National Cancer Centre (CNIO), Madrid E-28029, Spain

<sup>2</sup>Servicio de Anatomía Patológica, Hospital Universitario Marqués de Valdecilla, Santander 39008, Spain

<sup>3</sup>Servicio de Cirugía Torácica, Hospital Universitario Marqués de Valdecilla, Santander 39008, Spain

<sup>4</sup>Servicio de Neumología Hospital Universitario Marqués de Valdecilla, Santander E-39008, Spain

<sup>5</sup>Institute of Biomedicine and Biotechnology of Cantabria (IBBTEC), Cantabria, Santander E-39011, Spain

<sup>6</sup>Instituto de Investigación Marqués de Valdecilla (IDIVAL), Santander E-39011, Spain

<sup>7</sup>Departamento de Fisiología y Farmacología, Universidad de Cantabria, Santander E-39011, Spain

**Correspondence to:** Maria A. Blasco; email: [mblasco@cnio.es](mailto:mblasco@cnio.es)

**Keywords:** ATII cells, lung fibrosis, telomeres, COVID-19, SARS-CoV2

**Received:** March 30, 2023

**Accepted:** May 10, 2023

**Published:** June 7, 2023

**Copyright:** © 2023 Martínez et al. This is an open access article distributed under the terms of the [Creative Commons Attribution License](https://creativecommons.org/licenses/by/3.0/) (CC BY 3.0), which permits unrestricted use, distribution, and reproduction in any medium, provided the original author and source are credited.

## ABSTRACT

The severe acute respiratory syndrome coronavirus 2 (SARS-CoV-2) is responsible for the coronavirus disease 2019 (COVID-19) pandemic. The severity of COVID-19 increases with each decade of life, a phenomenon that suggest that organismal aging contributes to the fatality of the disease. In this regard, we and others have previously shown that COVID-19 severity correlates with shorter telomeres, a molecular determinant of aging, in patient's leukocytes. Lung injury is a predominant feature of acute SARS-CoV-2 infection that can further progress to lung fibrosis in post-COVID-19 patients. Short or dysfunctional telomeres in Alveolar type II (ATII) cells are sufficient to induce pulmonary fibrosis in mouse and humans. Here, we analyze telomere length and the histopathology of lung biopsies from a cohort of alive post-COVID-19 patients and a cohort of age-matched controls with lung cancer. We found loss of ATII cellularity and shorter telomeres in ATII cells concomitant with a marked increase in fibrotic lung parenchyma remodeling in post- COVID-19 patients compared to controls. These findings reveal a link between presence of short telomeres in ATII cells and long-term lung fibrosis sequel in Post-COVID-19 patients.

## INTRODUCTION

The lung parenchyma or alveolar region of the lung is where the gas exchange takes place and corresponds to 80-90% of the total lung volume. The remaining non-parenchyma consists of the conducting airways, trachea, bronchi and bronchioles, as well as blood vessels. The alveolar epithelium is composed by alveolar type I (ATI) and alveolar type II (ATII) cells, both with

distinct functional specialization and structural differentiation [1]. ATI cells comprise the major gas exchange surface of the alveolus and are key for the maintenance of the permeability barrier of the alveolar membrane. ATII are the progenitor cells for ATI and also responsible for surfactant production and homeostasis [2]. ATI cells are more sensitive to injuries than ATII [3]. Once ATI cells are damaged, adjacent ATII are stimulated to proliferate and transdifferentiate

into ATI. ATII cells with self-renewal capacity function as progenitors for the lung parenchyma restoring the epithelium after lung injury [1]. Thus, it is conceivable that cumulative damage to ATI or ATII cells could be at the origin of exhaustion of the regenerative potential of lungs and lung degenerative diseases.

Telomeres are specialized structures at the chromosome ends, which are essential for chromosome-end protection and genomic stability. Vertebrate telomeres consist of tandem repeats of the TTAGGG DNA sequence bound by a six-protein complex known as shelterin, which prevents chromosome end-to-end fusions, telomere fragility, and the induction of a persistent DNA damage response [4, 5]. As cells divide and DNA has to be replicated, telomeres become progressively shorter owing to the so-called “end replication problem” [6, 7]. Thus, telomere shortening occurs associated with increasing age in humans [8], mice [9] and other species, and the rate of telomere shortening has been shown to correlate with species lifespan [10]. When telomeres become critically short this results in loss of telomere protection and telomere damage, leading to activation of a persistent DNA damage response and loss of cellular viability by induction of apoptosis and/or senescence [4, 5].

Idiopathic pulmonary fibrosis (IPF) is a rare lung disease characterized by progressive loss of functional lung cells and fibrosis of the lung parenchyma. IPF can be both a sporadic and a familial disease. The familial cases are linked to mutations in surfactant related genes or in telomere maintenance genes [11–13]. Sporadic cases of IPF, not associated with telomere maintenance genes mutations, also show shorter telomeres in blood and in ATII cells compared to age-matched controls, with 25% of the patients showing telomeres as short as the telomerase mutation carriers [14, 15].

Of importance, induction of telomere dysfunction specifically in alveolar type II (ATII) cells, and not in other cell types including fibroblast, basal cells or Clara cells, is sufficient to induce progressive and lethal pulmonary fibrosis in lung parenchyma in mice, which is concomitant with induction of telomeric DNA damage, cell death and cellular senescence [16–20]. Indeed, in fibrotic human lungs as well as in mouse models for lung fibrosis, senescent ATII are observed [1, 2, 17, 21, 22], in line with the notion that telomere shortening or telomere dysfunction could be at the origin of this degenerative lung disease.

The severe acute respiratory syndrome coronavirus 2 (SARS-CoV-2) is responsible for the coronavirus disease 2019 (COVID-19) pandemic. COVID-19 severity has been associated to increasing age of the

infected patients, suggesting a component of aging in the disease [23, 24]. In this regard, we and others have shown that the severity of the COVID-19 disease is associated with higher abundance of shorter telomere length in patient’s leukocytes [23, 25, 26], raising the hypothesis that short telomeres maybe contributing to the COVID-19 disease.

Of interest, the SARS-CoV-2 virus uses the angiotensin-converting enzyme 2 (ACE2) as the receptor for cellular entry [27, 28]. In normal human lungs, Type II alveolar (ATII) epithelial cells constitute the majority of ACE2-expressing lung cells (83%) although only 1.4% of ATII cells express ACE2 indicating that ACE2 expression does take place in a special small population of ATII cells. The remaining 17% of ACE2-expressing cells in the lung include type I alveolar (ATI), airway epithelial cells, fibroblast, macrophages and endothelial cells [29]. The fact that SARS-CoV-2 targets ATII cells in the lung explains the severe alveolar damage in severe COVID-19 patients [29]. Of interest, lung injury is a predominant feature of acute SARS-CoV-2 infection. The abnormal imaging pattern of COVID-19 patients with severe pneumonia suggests that these patients are likely at an increased risk of progression to post-COVID-19 development of lung fibrosis with permanent functional impairment. Indeed, post-COVID-19 pulmonary fibrosis is being considered as a major sequelae of the pandemic [30].

Here, we set to address whether short telomeres in the lungs of post- COVID-19 patients could be at the origin of virus-induced pulmonary fibrosis. To this end, we performed histopathological analysis of lung biopsies from a cohort of 19 alive post-COVID-19 patients and 79 age-matched controls, and found marked fibrotic lung parenchyma remodeling with fibroblast proliferation, airspace destruction and reduced ATII abundance in post-COVID-19 patients compared to controls. Most relevant, post-COVID-19 patients presented with shorter telomeres in ATII cells compared to age-matched controls. These findings suggest a role for short telomeres in the origin of severe COVID-19 sequelae, such as pulmonary fibrosis.

## RESULTS

### Cohort of COVID-19 patients and age-matched controls

In order to study a potential role of short telomeres in the origin of the post-viral lung fibrosis sequel presented by a percentage of COVID-19 patients, paraffin-embedded lung samples from post-COVID-19 and COVID-19-free patients were obtained from the University Hospital of Marques de Valdecilla in

Santander, Spain. In all cases, lung samples corresponded to biopsies from non-tumoral areas of the lungs from lung cancer patients. The samples used for the analysis were confirmed to correspond to normal, non-tumoral tissue by using pathological analysis. Cancer patients were used owing to the fact that normal lung biopsies were readily available. A total of 35 females and 63 males of ages ranging from 42 to 84 years old were included in the study (Table 1). Nineteen patients, 5 females and 14 males, passed the COVID-19 disease previous to lung surgery, while the rest of the patients never had the COVID-19 disease. The clinical and demographic characteristics of patients under the study are summarized in Table 2. Of note, histopathological analysis of lung samples post-surgery showed that 59% of COVID-19 patients (11 out of 19) and 19% of control patients (15 out of 79) presented lung fibrosis (Tables 1, 2). It should be pointed out that none of the COVID-19 patients had fibrosis prior to SARS CoV-2 infection based on either chest radiographs or CT scans performed before infection. None of the COVID-19 patients had CT lung pannelization characteristic of the usual interstitial pneumonia. Of note, echocardiographic findings are suggestive of pulmonary hypertension in only one patient from control group.

### **Progressive telomere shortening with age in lung parenchyma**

To address the potential role of telomere length in COVID-19 associated lung pathologies, we analyzed telomere length in a single-cell manner in lung cells from the lung parenchyma by using Quantitative telomere Fluorescence *In Situ* Hybridization (Q-FISH), a technique that allows quantification of individual telomere fluorescence spots per interphasic nuclei in tissue sections, which in turn serve to quantify telomere length [31]. To distinguish between ATII and non-ATII cells in the lung parenchyma, we combined the Q-FISH technique with an immunofluorescence staining using specific antibody against prosurfactant protein C (pro-SPC), a bona fide marker of ATII cells. First, we represented the distribution of the mean telomere spot intensity per nucleus in ATII and non-ATII cells from each control and COVID-19 samples (Supplementary Figure 1). Linear regression analysis between average of mean telomere spot intensity per nucleus and patient's age, revealed a significant telomere shortening with increasing age in both ATII and non-ATII lung cells, something that has been described for other cell types previously but not for lung cell populations in humans [32–35] (Figure 1A, 1B). In agreement with telomere shortening with increasing patient age in lung cells, we also observed statistically significant increase in the abundance of short telomeres (ie, telomere

fluorescence below 20<sup>th</sup> percentile of all telomeres in control samples) and a significant decrease in the abundance of long telomeres (ie, telomere fluorescence above 80<sup>th</sup> percentile of all telomeres in control samples) only in ATII cells but not in non-ATII cells (Figure 1C–1F). This observation could be explained by the fact that the progenitor nature of ATII cells could lead to a higher proliferative history compared to non-ATII cells within the lung parenchyma and a consequently higher rate of telomere shortening associated to cell division with age. Consistent with this notion, we found a higher rate of decrease of telomere length, a higher rate of increase in the abundance of short telomeres, as well as a higher rate of decrease in the abundance of long telomeres with age in ATII cells compared with non-ATII cells in the linear regression models (Figure 1A–1F).

### **COVID-19 patients present shorter telomeres in ATII cells than age-matched controls**

In order to assess the potential correlation between telomere length in lung tissue and COVID-19 disease, we compared the average mean telomere intensity per nucleus of COVID-19 patients with that of controls both in ATII and non-ATII cells within the lung parenchyma (Figure 2A–2H). We performed the analysis in age-matched individuals within an age interval from 62 to 84 year old in which most of COVID-19 patients are found (18 out of 19 COVID-19 samples). First, we used the Kolmogorov-Smirnov (KS) test to assess whether the cumulative frequency distribution of patient's age from control and COVID-19 groups were different. The KS test revealed similar age distribution in control and COVID-19 patients ruling out bias in the potential differences in telomere length due to different ages between both groups (Figure 2A).

Then, we compared the mean telomere intensity per nucleus in ATII cells in both control and COVID-19 patients and found a significant 6% lower mean telomere fluorescence intensity in ATII cells from COVID-19 patients compared to those from controls (Figure 2C). In accordance with this, we also found a significant 42% decrease in the abundance of long telomeres above the 80<sup>th</sup> percentile in the telomeres of control samples (Figure 2D). We also found a 30% increase in the abundance of short telomeres below 20<sup>th</sup> percentile of control samples although this difference did not reach statistical significance (Figure 2E). Interestingly, although we also observe a similar trend in telomere length, long and short telomere abundance in non-ATII cells, none of these comparisons reached statistical significance (Figure 2F–2H). These observations support the fact that SARS-Cov2 mainly infects ATII cells, and thus can lead to increased

**Table 1. Control and COVID-19 patients under study.**

|                 | <b>Sex</b> | <b>Age (years)</b> | <b>Biopsy</b> | <b>Fibrosis</b> |
|-----------------|------------|--------------------|---------------|-----------------|
| <b>Controls</b> |            |                    |               |                 |
| Control 1       | Male       | 45                 | B20-4315      | No              |
| Control 2       | Female     | 59                 | B20-16593     | No              |
| Control 3       | Female     | 83                 | B20-20700     | No              |
| Control 4       | Male       | 78                 | B21-1572      | No              |
| Control 5       | Male       | 65                 | B21-2679      | No              |
| Control 6       | Male       | 84                 | B21-2688      | No              |
| Control 7       | Female     | 80                 | B21-470       | No              |
| Control 8       | Female     | 62                 | B21-571       | No              |
| Control 9       | Female     | 66                 | B21-613       | No              |
| Control 10      | Female     | 63                 | B21-1042      | No              |
| Control 11      | Male       | 54                 | B21-1132      | No              |
| Control 12      | Female     | 71                 | B21-1599      | No              |
| Control 13      | Male       | 60                 | B21-2199      | Yes             |
| Control 14      | Male       | 78                 | B21-2358      | Yes             |
| Control 15      | Male       | 66                 | B21-2679      | No              |
| Control 16      | Female     | 69                 | B21-2739      | No              |
| Control 17      | Male       | 68                 | B21-4443      | No              |
| Control 18      | Male       | 77                 | B21-7920      | No              |
| Control 19      | Male       | 73                 | B21-7869      | No              |
| Control 20      | Male       | 73                 | B21-8659      | No              |
| Control 21      | Male       | 69                 | B21-9201      | No              |
| Control 22      | Female     | 76                 | B21-9647      | No              |
| Control 23      | Male       | 64                 | B21-11060     | No              |
| Control 24      | Male       | 64                 | B21-11606     | Yes             |
| Control 25      | Female     | 70                 | B21-12024     | No              |
| Control 26      | Male       | 68                 | B21-12168     | Yes             |
| Control 27      | Male       | 72                 | B21-12186     | Yes             |
| Control 28      | Male       | 73                 | B21-12752     | No              |
| Control 29      | Male       | 66                 | B21-13359     | No              |
| Control 30      | Female     | 66                 | B21-14681     | No              |
| Control 31      | Female     | 62                 | B21-14588     | No              |
| Control 32      | Male       | 58                 | B21-15032     | No              |
| Control 33      | Female     | 42                 | B21-15986     | No              |
| Control 34      | Male       | 59                 | B21- 16407    | No              |
| Control 35      | Female     | 84                 | B21- 16496    | No              |
| Control 36      | Male       | 60                 | B21- 18388    | No              |
| Control 37      | Male       | 47                 | B21- 18468    | No              |
| Control 38      | Female     | 50                 | B21- 18433    | No              |
| Control 39      | Female     | 68                 | B21- 18891    | No              |
| Control 40      | Female     | 63                 | B21-19598     | No              |
| Control 41      | Male       | 66                 | B21-20680     | No              |
| Control 42      | Male       | 77                 | B21-20835     | No              |
| Control 43      | Male       | 72                 | B21-21282     | No              |
| Control 44      | Male       | 66                 | B21-22922     | No              |
| Control 45      | Male       | 66                 | B21-23007     | No              |
| Control 46      | Male       | 80                 | B21-23575     | No              |
| Control 47      | Male       | 70                 | B21-23641     | No              |
| Control 48      | Female     | 61                 | B21-24222     | No              |
| Control 49      | Female     | 72                 | B21-24182     | No              |
| Control 50      | Male       | 74                 | B21-25026     | Yes             |
| Control 51      | Female     | 66                 | B21-25449     | Yes             |
| Control 52      | Male       | 79                 | B21-26566     | No              |
| Control 53      | Male       | 72                 | B21-26640     | No              |
| Control 54      | Female     | 74                 | B21-27377     | No              |
| Control 55      | Male       | 73                 | B21-27275     | No              |
| Control 56      | Male       | 77                 | B21-27490     | No              |
| Control 57      | Male       | 68                 | B21-27550     | No              |

|               |        |    |            |     |
|---------------|--------|----|------------|-----|
| Control 58    | Female | 53 | B22-398    | No  |
| Control 59    | Male   | 60 | B22-1485   | No  |
| Control 60    | Male   | 79 | B22-1607   | No  |
| Control 61    | Female | 74 | B22-2114   | No  |
| Control 62    | Male   | 57 | B22-2267   | Yes |
| Control 63    | Female | 68 | B22-3903   | No  |
| Control 64    | Male   | 71 | B22-4103   | No  |
| Control 65    | Female | 73 | B22-5408   | Yes |
| Control 66    | Male   | 72 | B22-5333   | Yes |
| Control 67    | Female | 58 | B22-5843   | No  |
| Control 68    | Male   | 74 | B22-5932   | No  |
| Control 69    | Male   | 71 | B22-6089   | No  |
| Control 70    | Male   | 69 | B22-6592   | Yes |
| Control 71    | Female | 58 | B22-7124   | Yes |
| Control 72    | Male   | 71 | B22-7226   | No  |
| Control 73    | Male   | 66 | B22-8331   | Yes |
| Control 74    | Male   | 79 | B22-8447   | Yes |
| Control 75    | Female | 63 | B22-8816   | No  |
| Control 76    | Male   | 70 | B22-9475   | No  |
| Control 77    | Female | 83 | B22-9599   | No  |
| Control 78    | Female | 63 | B22-9988   | No  |
| Control 79    | Male   | 82 | B22-10535  | Yes |
| <b>Covids</b> |        |    |            |     |
| Covid 1       | Female | 82 | B20-15688  | Yes |
| Covid 2       | Male   | 67 | B20-9722   | Yes |
| Covid 3       | Female | 69 | B20-8325   | Yes |
| Covid 4       | Male   | 66 | B21-1539   | No  |
| Covid 5       | Male   | 73 | B21-6981   | No  |
| Covid 6       | Male   | 77 | B21-10260  | Yes |
| Covid 7       | Male   | 65 | B21-11564  | Yes |
| Covid 8       | Male   | 72 | A21-6      | Yes |
| Covid 9       | Male   | 66 | B21-5757   | No  |
| Covid 10      | Male   | 79 | B21-13286  | Yes |
| Covid 11      | Female | 48 | B21- 18230 | No  |
| Covid 12      | Male   | 79 | B21-25575  | Yes |
| Covid 13      | Male   | 62 | B22-508    | No  |
| Covid 14      | Male   | 64 | B22-1037   | Yes |
| Covid 15      | Female | 64 | B22-4011   | No  |
| Covid 16      | Male   | 76 | B22-6717   | Yes |
| Covid 17      | Male   | 64 | B22-8708   | No  |
| Covid 18      | Female | 84 | B22-9363   | Yes |
| Covid 19      | Male   | 72 | B22-10050  | No  |

Results from histopathological diagnose of lung fibrosis post-surgery are indicated.

turn-over of the remaining progenitor ATII cells in an attempt to regenerate the COVID-19 induced lung damage, which in turn accelerates telomere shortening in these cells. Short/dysfunctional telomeres in ATII cells impair lung damage repair and are sufficient to trigger interstitial pulmonary fibrosis in mouse models [17].

### COVID-19 patients present lung fibrosis

In line with the above, a potential outcome of SARS-CoV-2 infection is the induction of fibrosis-like phenotypes in the lung, suggesting that the viral infection maybe exhausting the regenerative potential

of lung tissue [36–39]. Indeed, histopathological analysis of lung samples post-surgery showed that the incidence of lung fibrosis was 3-fold higher among COVID-19 than in control patients, 59% and 19%, respectively (Table 2). We further analyzed the lung fibrotic pathologies in a subset of our patient cohorts by performing Masson trichrome and Sirius red staining for histological evaluation of collagen fibers and by immunohistochemical staining of  $\alpha$ -smooth muscle actin (SMA), a marker of activated fibroblasts and myofibroblasts that secrete extracellular components required for wound repair [40]. Quantitative analysis of Masson trichrome,



**Table 2. Clinical data of patients.**

| Variable                                                          | COVID19 | Surgical controls |
|-------------------------------------------------------------------|---------|-------------------|
| Number                                                            | 19      | 79                |
| Gender (F/M)                                                      | 5/14    | 35/64             |
| Age (years)                                                       | 70±9    | 68±9              |
| Current smoking (yes/no)                                          | 3/16    | 23/56             |
| COVID19 mild/severe                                               | 11/8    | -                 |
| Pre-COVID19 lung fibrosis diagnosed by molecular imaging (yes/no) | 0/19    | -                 |
| Post-surgery lung fibrosis diagnosed by histopathology (yes/no)   | 11/8    | 15/64             |
| Pulmonary Hypertension (yes/no)                                   | 0/19    | 1/78              |
| Concomitant diseases (C/R/D)                                      | 6/3/2   | 21/24/11          |
| CT scan with ground opacity (yes/no)                              | 7/12    | -                 |
| CT scan pulmonary effusion                                        | 13/6    | -                 |
| Pulmonary function test (positive/negative)                       | 13/6    | -                 |
| Respiratory bronchiolitis                                         | 5/14    | 28/51             |
| Treatment with immunosuppressants or immunomodulators (yes/no)    | 5/14    | 6/73              |

Patient demographic and clinical characteristics are presented as mean ± standard deviation. F, female; M, male; C, cardiovascular; R, Respiratory; D, diabetes, - not performed.

Sirius red and SMA revealed that histopathologically diagnosed with pulmonary fibrosis post-surgery in control and COVID-19 patient cohorts present significant higher collagen depots and increased presence of activated fibroblasts and/or myofibroblasts as compared to control lungs (Figure 3A–3D).

We next compared telomere length and the percentage of long and short telomeres in ATII cells in histopathological diagnosed fibrotic and no-fibrotic patients within the age range of 62- to 84-year-old (Table 1 and Figure 4). The results clearly showed that non-fibrotic COVID-19 patients showed a 7-fold higher rate of telomere shortening than their age-matched non-fibrotic controls (Figure 4A). In contrast, the rate of telomere shortening was similar when comparing fibrotic controls with fibrotic COVID-19 patients (Figure 4B). Non-fibrotic COVID-19 patients present shorter mean telomere length, increased percentage of short telomeres and lower percentage of long telomeres in ATII cells as compared to age-matched non-fibrotic control patients (Figure 4C–4G), supporting the notion that short telomeres are a risk factor for SARS-CoV2 infection [23, 25, 26]. It should be pointed out that the difference in short telomeres between non-fibrotic COVID-19 and control patients is even observed in a COVID-cohort younger than its correspondent control-cohort (mean age of 66 and 71 in COVID-19 and controls, respectively) (Figure 4C). No significant

differences were detected in mean telomere length and the percentage of long/short telomeres between fibrotic control and fibrotic COVID-19 cohorts (Figure 4D–4F), in agreement with the notion that short telomeres associate with pulmonary fibrosis [14, 15].

#### Decreased number of alveolar type II cells in the lungs of COVID-19 patients

As the SARS-CoV-2 virus is known to infect mainly ATII cells [29, 41], we set to analyze the percentage of ATII cells in control and COVID-19 samples by immune staining of Pro-surfactant protein C (Pro-SPC) as a specific marker of ATII cells. The results clearly show a significant lower number of ATII cells in COVID-19 patients compared to control lung samples (Figure 5A, 5B). Since ATII cells constitute the alveolar regenerative stem cells, this observation supports the notion that SARS-CoV-2 infection induces a regenerative/proliferative response that leads to further telomere shortening in ATII cells that may contribute to ATII exhaustion.

## DISCUSSION

There is growing evidence of histopathological changes consistent with lung fibrosis in autopsied individuals infected with SARS-CoV-2 who died with COVID-19 [42–44]. However, lung samples with histopathological

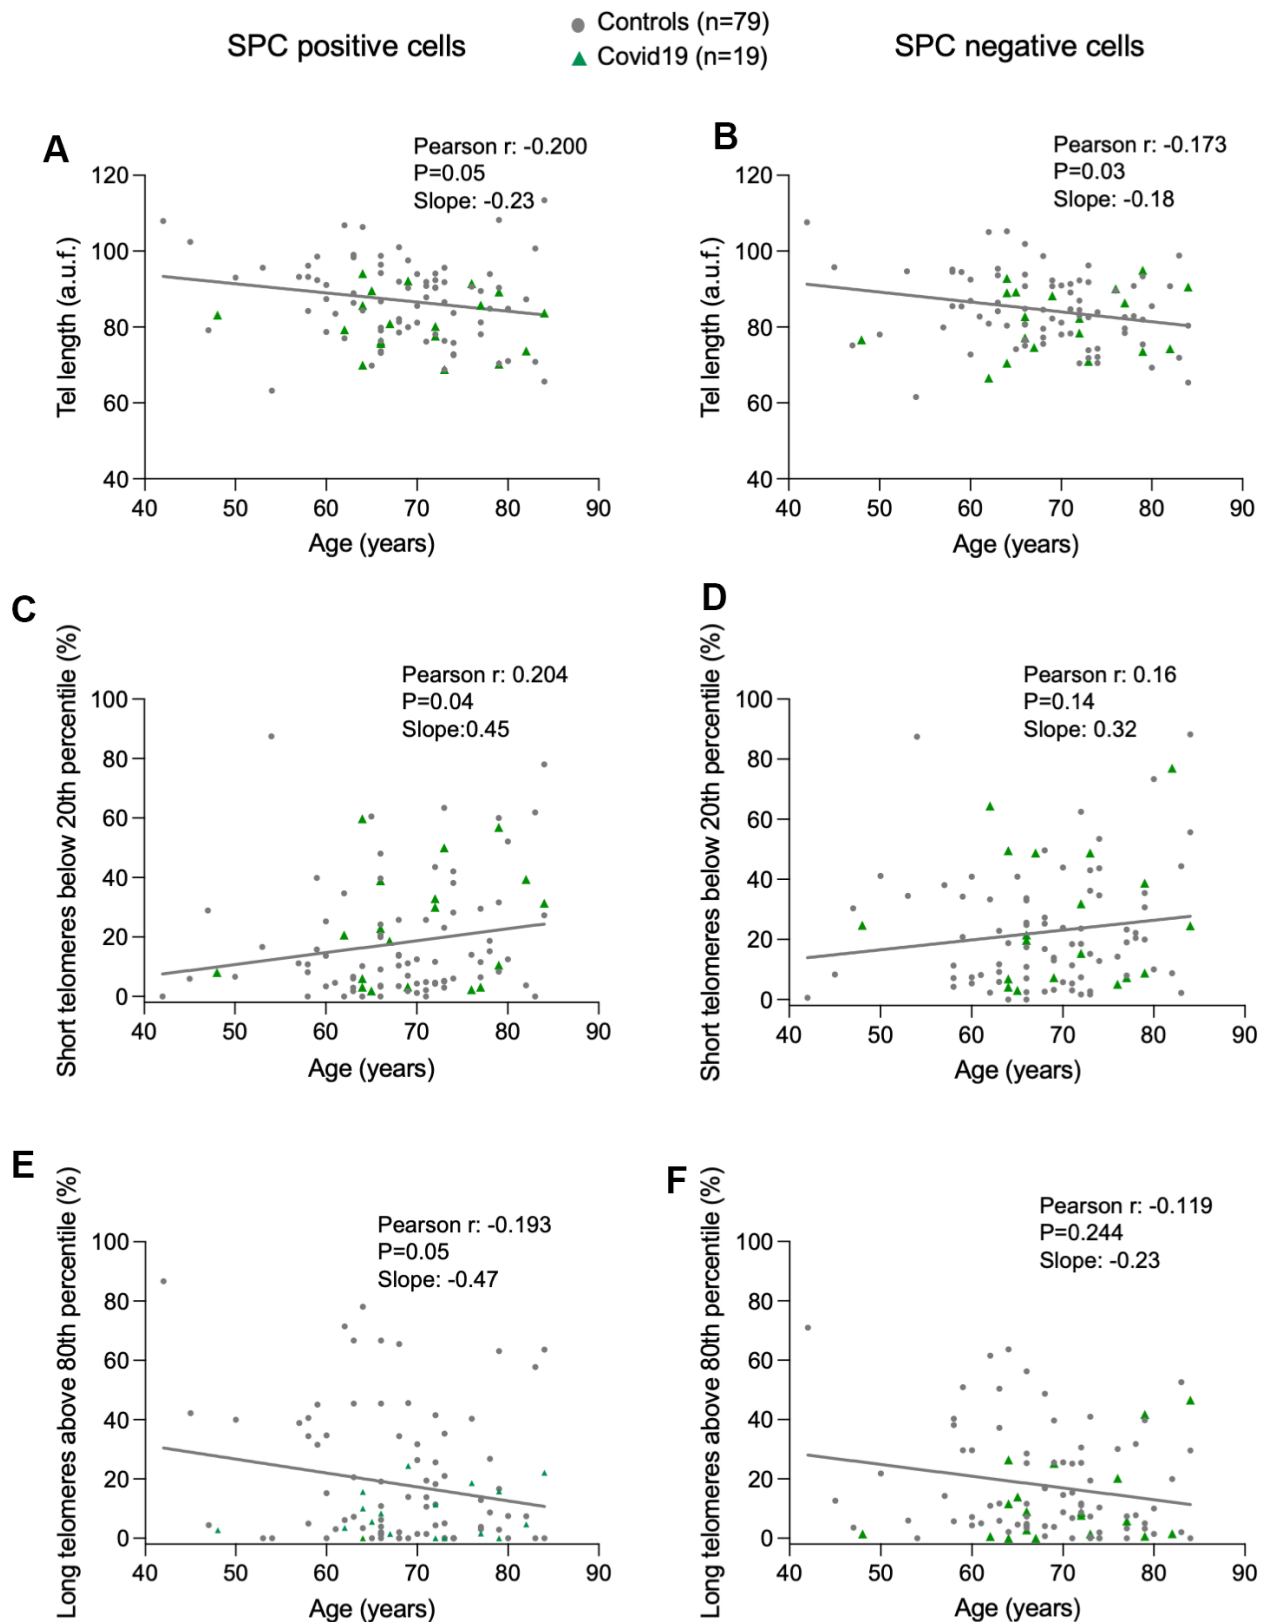

**Figure 1. Progressive telomere shortening with age in lung cells.** (A–F) Linear regression and Pearson correlation analyses between telomere intensity in pro-SPC positive (A) and pro-SPC negative cells (B), between percentage of short telomeres in pro-SPC positive (C) and pro-SPC negative cells (D), and between percentage of long telomeres in pro-SPC positive (E) and pro-SPC negative cells (F) and age in lung section from patients under study including control and COVID-19 samples. The Pearson r coefficient and the P value are indicated.

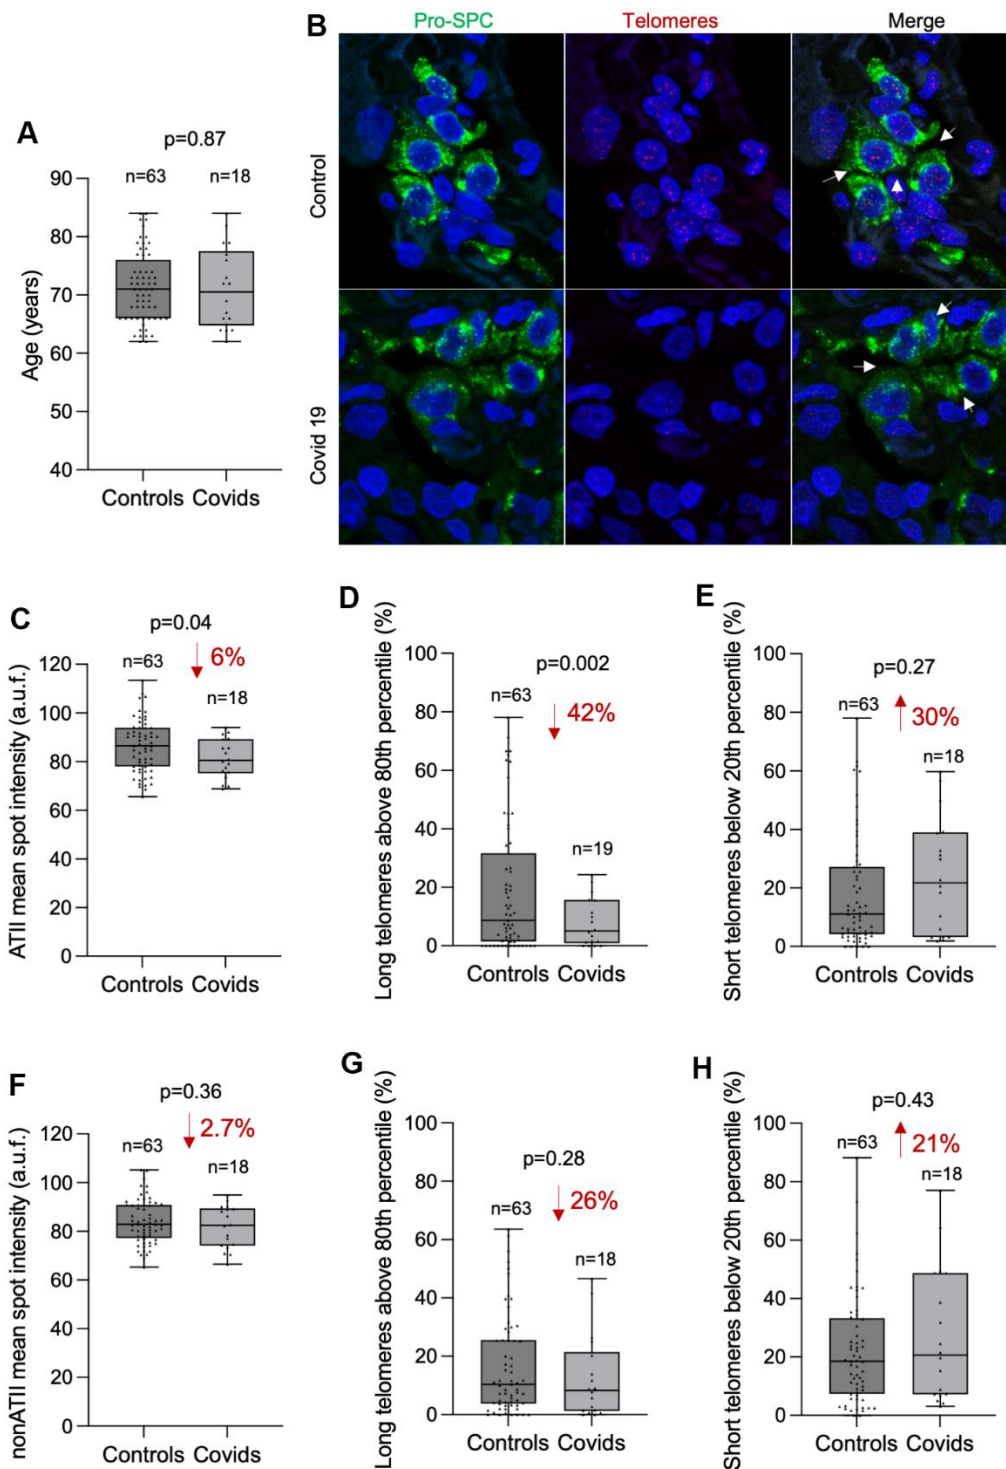

**Figure 2. COVID-19 patients present shorter telomeres in the alveolar type II cells than controls.** (A) Box and Whisker plot representation of control and COVID-19 patients' age within 62 and 84 years old. Differences in age distributions between both control and COVID-19 sample groups was analyzed by Kolmogorov-Smirnov test. The p-value is indicated. (B) Representative images of telomere quantitative fluorescence *in situ* hybridization (q-FISH) combined with immunofluorescence against Pro-SPC in a control and a COVID-19 lung samples. (C–H) Box and Whisker plot representation of mean telomeric spot intensity per nucleus (C, F), percentage of long telomeres above 80<sup>th</sup> percentile (D, G) and percentage of short telomeres below 20<sup>th</sup> percentile (E, H) in alveolar type II (ATII) (C–E) and in non-ATII cells (F–H) in lung sections from control and COVID-19 patients within 62 and 84 year-old age interval. Statistical significance in (C–H) was assessed using unpaired Student's t test with Welch's correction and the p-value is indicated. The percent increase or decrease between control and COVID-19 samples are indicated in each plot.



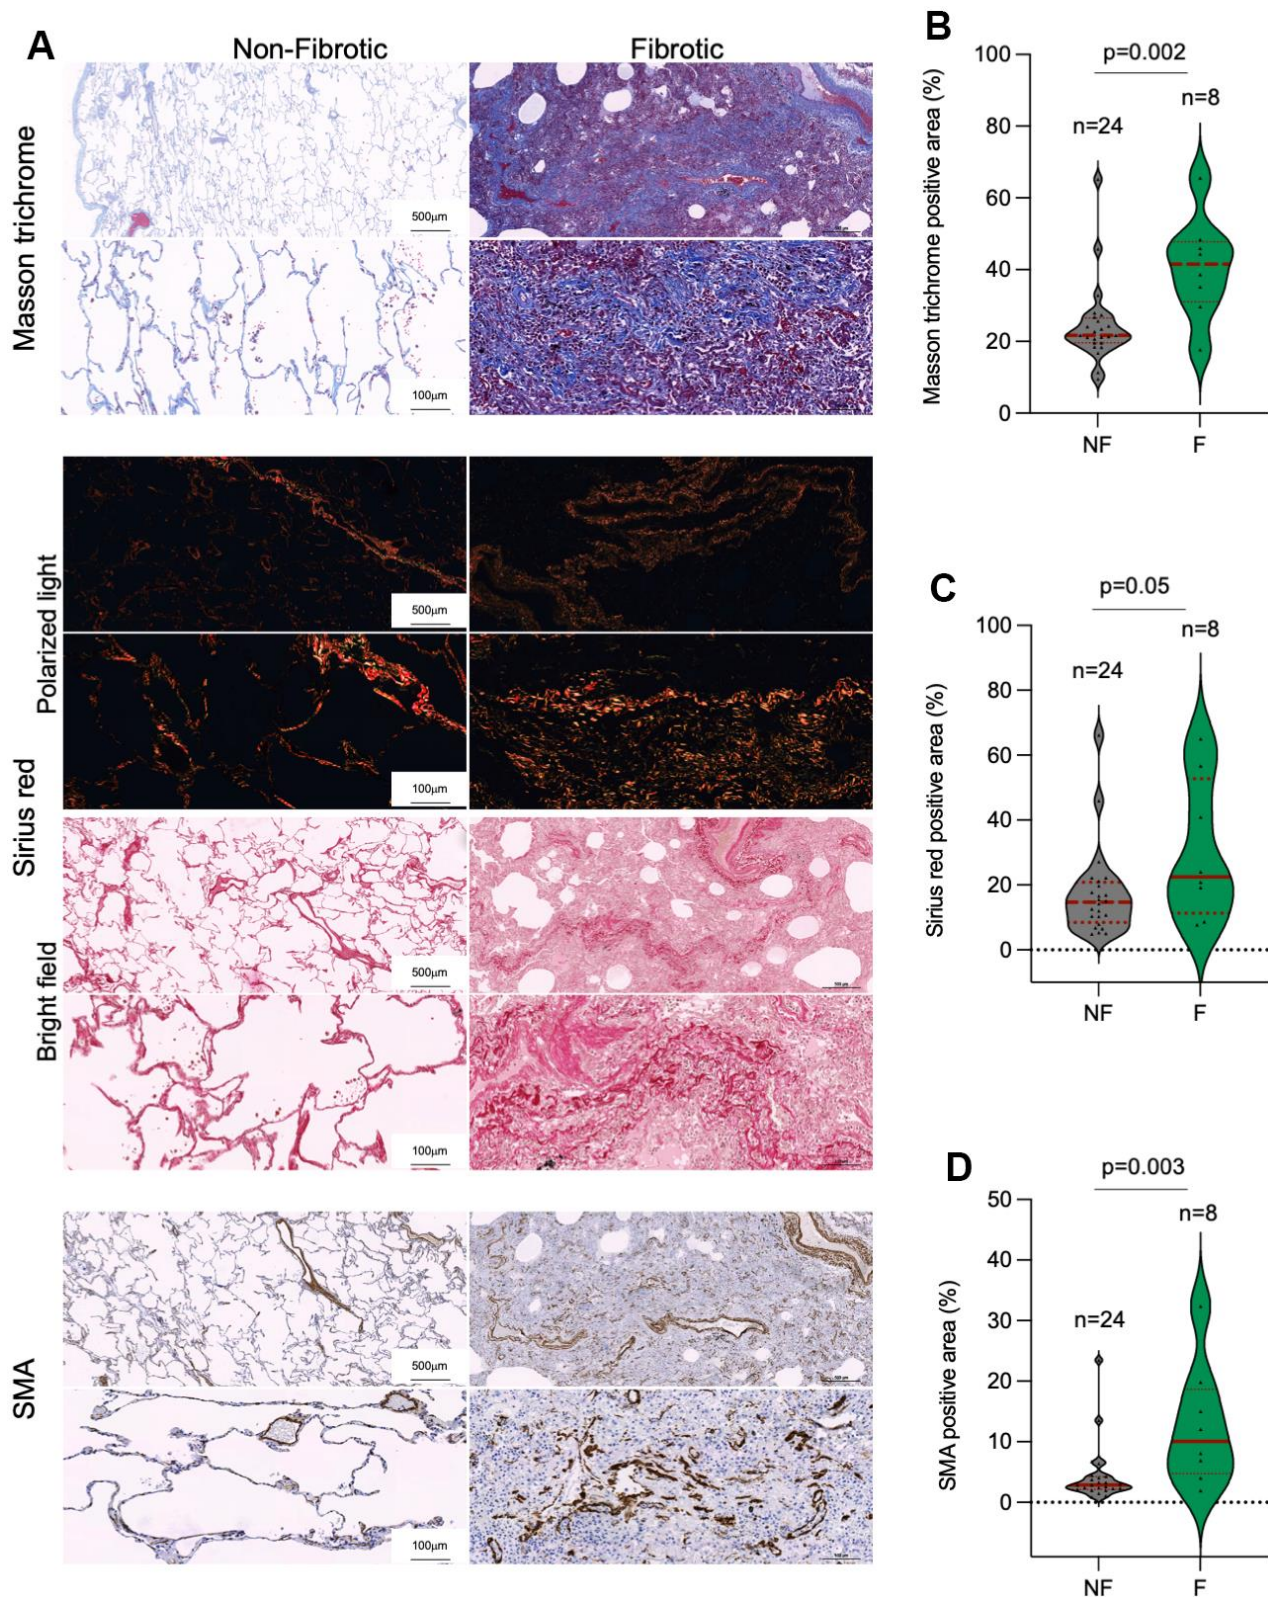

**Figure 3. Collagen depots in patients diagnosed with lung fibrosis post-surgery.** (A) Representative images of Masson trichrome, Sirius red (polarized light and bright field) and smooth muscle actin (SMA) staining in non-fibrotic and fibrotic lungs. (B–D) Quantification of Masson trichrome (B), Sirius red (C) and SMA (D) positive stained lung area in non-fibrotic (NF) and fibrotic (F) lung samples. The samples analyzed correspond to Control 1-23 and COVID-19 1-9 (Table 1). Statistical significance was assessed using Student's t test and the p-value is indicated.

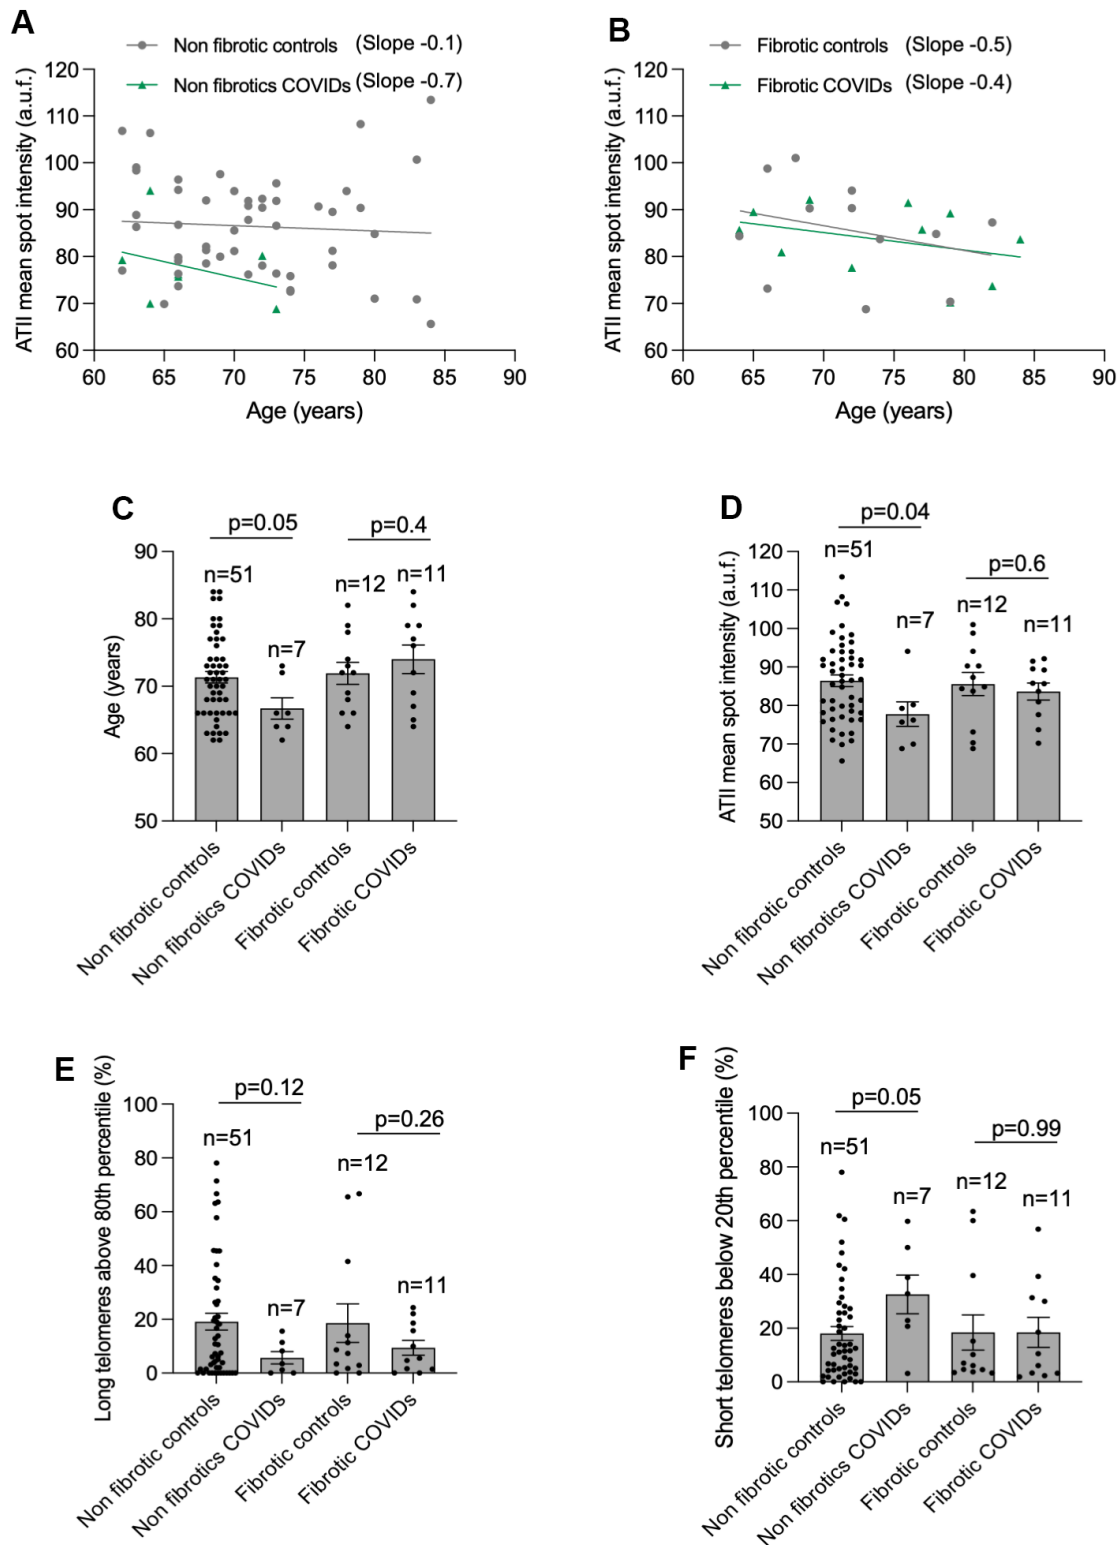

**Figure 4. Higher rate of telomere shortening with age in COVID-19 patients.** (A, B) Linear regression analyses between telomere intensity in pro-SPC positive cells and age in lung section from control and COVID-19 patients not presenting lung fibrosis (A) or being histopathologically diagnosed with lung fibrosis (B) post-surgery. The slope of the linear regression is shown. (C) Mean age of control and COVID-19 patients within 62 and 84 year-old interval presenting or not lung fibrosis post-surgery. (D-F) Mean telomeric spot intensity per nucleus (D), percentage of long telomeres above 80<sup>th</sup> percentile (E) and percentage of short telomeres below 20<sup>th</sup> percentile (F) in alveolar type II in lung sections from control and COVID-19 patients within 62 and 84 year-old age interval. Statistical significance in (C-F) was assessed using unpaired Student's t test and the p-value is indicated.



information in post-COVID-19 survivors is highly limited. There are few case reports of post-COVID-19 patients that died from diseases other than acute COVID-19 whose lung histopathology examination revealed extensive lung fibrotic changes with interstitial pattern (<https://pesquisa.bvsalud.org/global-literature-on-novel-coronavirus-2019-ncov/resource/pt/covidwho-1857241>). In particular, there is one case report of a post-COVID-19 patient that died of lung failure as the consequence of widespread pulmonary fibrosis without a previous history of pulmonary illness [45]. These findings of histologically-proven lung fibrosis long after SARS-CoV2 infection resolution provide strong evidence of long-lasting lung fibrosis sequel in post-COVID-19 patients.

Here, we analyze lung biopsies from a cohort of alive post-COVID-19 patients and a cohort of patients who had not passed the disease, which we used as controls. We found significantly higher incidence of fibrotic lung parenchyma remodeling with fibroblast proliferation and myofibroblast differentiation, airspace obliteration and reduced ATII abundance in post-COVID-19 patients compared to controls. These findings suggest that the previous SARS-CoV-2 infection was causative of PF development. We also found that post-COVID-19 patients as well as control patients that present lung fibrosis post-surgery show significantly shorter telomeres than age matched controls in the lung parenchyma, specifically in ATII cells. These observations might reflect that the SARS-CoV-2 infection of ATII cells induces telomere shortening as a consequence of enhanced proliferative response to regenerate the alveolar damage leading to exhaustion of

the regenerative potential of the lung tissue. In this regard, telomere exhaustion in ATII cells will be more likely to happen in older patients, which already have shorter telomeres in the organism as the consequence of aging, in agreement with our previous findings in mice [46]. This may explain the higher mortality caused by SARS-CoV-2 infection at older ages. Indeed, we and others had previously showed that presence of short telomeres can influence the severity of COVID-19 pathologies, i.e. patients presenting more severe COVID-19 pathologies have shorter telomeres in leukocytes at different ages compared to the patients with milder disease [23, 25, 26].

These findings are also in line with previous observations showing shorter telomeres in ATII cells, but not in non-ATII cells, in fibrotic areas compared to non-fibrotic ones in PF patients [47]. Although we cannot rule out that a different outcome might have been observed in COVID-19 patients not having cancer, the fact that both cohorts, controls and COVID-19 patients, had lung cancer supports our statement that short telomeres in ATII cells associate with lung fibrosis in post-COVID-19 patients.

In conclusion, here we reveal a link between short telomere length in ATII cells and post-viral lung fibrosis outcome in post-COVID-19 patients. In particular, our results suggest a model in which the long-term maintenance of interstitial lung fibrosis in post-COVID-19 patients is triggered by short telomere length in ATII cells, which in turn could be the result of increased ATII turnover as the consequence of the viral infection, and/or pre-existing short telomeres in the

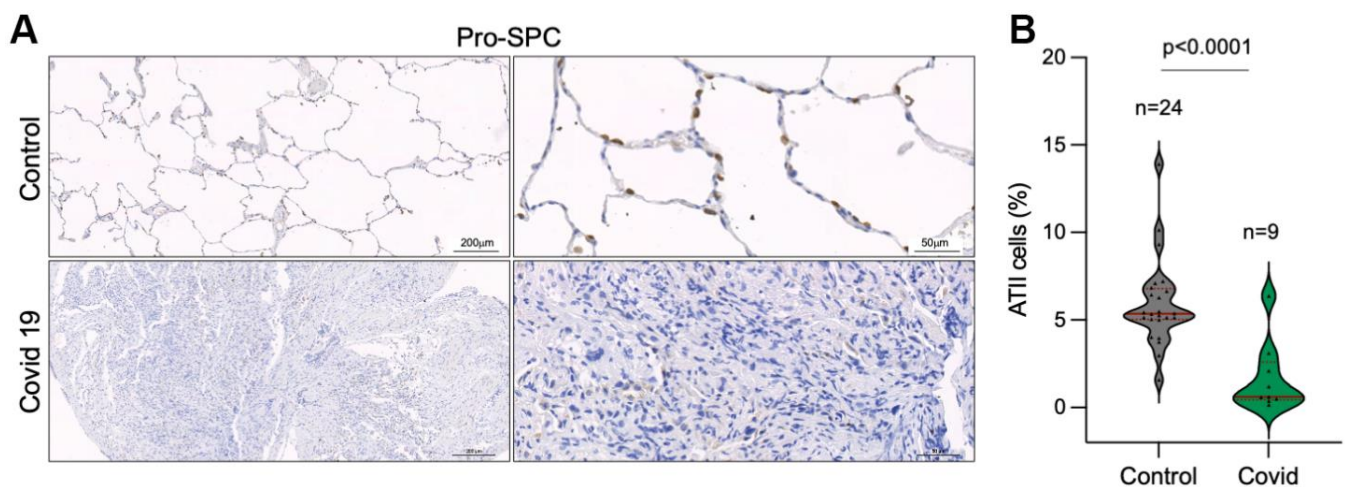

**Figure 5. Decreased number of alveolar type II cells in the lungs of COVID-19 patients.** (A, B) Representative images of prosurfactant protein C (pro-SPC) immunostaining, a marker of alveolar type II cells (ATII) (A) and quantification of pro-SpC positive cells in the lungs of control and COVID-19 patients (B) Statistical significance was assessed using Student's t test and the p-value is indicated.

patient associated to increasing age. As short telomeres can be elongated by telomerase, and telomerase activation strategies have been shown by us to have therapeutic effects in diseases associated to short telomeres, such as pulmonary fibrosis [21, 48], it is tempting to speculate that such telomerase activation therapies could improve tissue pathologies in post-COVID-19 patients such as lung fibrosis after overcoming the viral infection. Assuming at least 10% of COVID-19 survivors develop long COVID-19, and given that the global incidence reported by the World Health Organization (WHO) surpasses 600 million confirmed cases at the time of writing, it is clear that long COVID-19 has become a major public health concern that needs research (<https://covid19.who.int/>) [49].

## MATERIALS AND METHODS

### Patient data and lung sampling

Samples and data from a retrospective cohort of patients with passed COVID-19 previously to lung surgery were obtained. Patients were recruited from the University Hospital of Marques de Valdecilla in Santander, Spain. This study presents 19 COVID-19 subjects (5 females and 14 males) and 79 controls undergoing tumor resection surgery in which tumor and some of the healthy tissue near it were taken out. Patients were matched for age and sex (35 females and 64 males of ages ranging from 42 to 84 years old) (Table 1). The biopsies were obtained near the patient's tumor and corresponded to healthy tissue as confirmed by pathological analysis. The lung samples were paraffin-embedded.

### Histopathological and immunostaining analyses

Tissue samples were fixed in 10% buffered formalin, dehydrated, embedded in paraffin wax and sectioned at 2.5  $\mu\text{m}$ . Tissue sections were deparaffinized in xylene and re-hydrated through a series of graded ethanol until water. Immunohistochemistry (IHC) were performed on de-paraffined tissue sections processed with 10 mM sodium citrate (pH 6.5) cooked under pressure for 2 min. IHC staining of Prosurfactant Protein C (SP-C) and Smooth Muscle Actin (SMA) in lung sections was performed with anti-proSPC (1:2000; Merck, AB3786) and with anti-SMA (DAKO, IR611). Histopathological analysis of paraffin-embedded lungs was performed in lung sections stained with nuclear fast red and Masson's trichrome using standard procedures. To quantify collagen deposition Sirius red staining was performed on deparaffinised slides with picro-sirius red solution for 1 h. The slides were counterstained with hematoxylin and analyzed by light microscopy. Fiji open-source image processing software package v1.48r

(<http://fiji.sc>) was used for the quantification of lung collagen areas.

### Immunofluorescence and quantitative fluorescence *In Situ* hybridization (Q-FISH) analysis

Lung samples were fixed in 10% formalin, paraffine-embedded and cut in 2.5- $\mu\text{m}$  sections, which were mounted in superfrost plus portaobjects. Immunofluorescence was performed on deparaffinized samples processed with Tris-EDTA and cooked under pressure for 2 min for antigen retrieval. Tissues were permeabilized with 0.5% Triton X-100 in PBS for 3 h at room temperature. Samples were blocked in PBS with 4% BSA for 3h and incubated overnight at 4° C with pro-SPC antibody (1:100; Abcam ab90716). Slides were washed three times for 15 min with PBS with 0.1% Tween 20 and incubated with the secondary antibody Alexa Fluor 488 anti-rabbit (1:1000; Invitrogen A11008) for 1h at room temperature. Samples were washed three times for 15 min with PBS with 0.1% Triton X-100 and then fixed for 20 min in 4% paraformaldehyde in PBS. Quantitative FISH was performed as described before [50] with some modifications: samples were not treated with pepsin and were subjected directly to dehydration steps, formamide concentration during incubation with the probe and washes was reduced from 70% to 50% and incubation of the sample with the probe was reduced to 30 min. Telomere PNA probe labeled with CY3 (Panagene) was used. Nuclei were counterstained in a 4 $\mu\text{g}/\text{ml}$  DAPI/PBS solution before mounting with Vectashield (Vector Laboratories H-1000). Deparaffinized lung sections underwent antigen retrieval in 10 mM sodium citrate buffer and permeabilization was performed in PBS 0.5% Triton X-100 for 1.5 hours.

Immunofluorescence images were obtained using a confocal laser-scanning microscope (Leica TSC SP8) using a Plan Apo 63 $\times$ -1.40 NA oil immersion objective (HCX). Maximal projection of z-stack images generated using advanced fluorescence software (LAS) were analyzed with Definiens XD software package. The DAPI images were used to detect telomeric signals inside each nucleus.

### Abbreviations

ATI: alveolar type I cells; ATII: alveolar type II cells; IPF: Idiopathic pulmonary fibrosis; SARS-CoV-2: severe acute respiratory syndrome coronavirus 2; COVID-19: coronavirus disease 2019; ACE2: angiotensin-converting enzyme 2; Q-FISH: Quantitative telomere Fluorescence *In Situ* Hybridization; SMA:  $\alpha$ -smooth muscle actin; pro-SPC: prosurfactant protein C.

## AUTHOR CONTRIBUTIONS

MAB was the chief investigator of the study. MSRD, SNG, JSOC and AVR were the clinical team that performed the pathological, surgical and pneumology studies. PM performed experimental work and analyzed the data. RSV and AS contributed to experimental work. PM, MAB and AVR wrote the paper.

## ACKNOWLEDGMENTS

We are indebted to D. Megias for confocal microscopy analysis. The authors wish to thank BioBanco service, especially R. Madureira, from Hospital Universitario Valdecilla, Santander for its expertise.

## CONFLICTS OF INTEREST

The authors declare that they have no conflicts of interest.

## ETHICAL STATEMENT AND CONSENT

The Clinical Research Ethics Committee of the University Hospital of Marques de Valdecilla approved the study (INNVAl-20/34). All participants in the registry gave written informed consent prior to participation and the study complied with the Declaration of Helsinki.

## FUNDING

Research in the Blasco Lab is funded by Fundación Botín and Banco Santander (Spain); Agencia Estatal de Investigación (AEI/MCI/10.13039/501100011033) with the project RETOS SAF2017-82623-R, cofunded by European Regional Development Fund (ERDF), “A way of making Europe”; Comunidad de Madrid with the Synergy Project COVIDPREclinicalMODEls-CM and the European Research Council (ERC) under the European Union’s Horizon 2020 research and innovation programme (grant agreement No 882385) through the project ERC-AvG SHELTERINS. The CNIO, certified since 2011 as Severo Ochoa Centre of Excellence by AEI/MCI/10.13039/501100011033, is supported by the Spanish Government through the Instituto de Salud Carlos III (ISCIII). Research in the Villar Lab is funded by Agencia Estatal de Investigación RTI2018-095214-B-I00, Gobierno de Cantabria SUBVTC-2021-0011, Fomento de la transferencia de conocimiento en la Comunidad Autónoma de Cantabria 2020UCI22-PUB-000 and by Fundación IDIVAL INNVAl20/34. The sponsors did not have any input or contributions in the development of the research and manuscript.

## REFERENCES

1. Knudsen L, Ochs M. The micromechanics of lung alveoli: structure and function of surfactant and tissue components. *Histochem Cell Biol.* 2018; 150:661–76. <https://doi.org/10.1007/s00418-018-1747-9> PMID:[30390118](https://pubmed.ncbi.nlm.nih.gov/30390118/)
2. Olajuyin AM, Zhang X, Ji HL. Alveolar type 2 progenitor cells for lung injury repair. *Cell Death Discov.* 2019; 5:63. <https://doi.org/10.1038/s41420-019-0147-9> PMID:[30774991](https://pubmed.ncbi.nlm.nih.gov/30774991/)
3. Herzog EL, Brody AR, Colby TV, Mason R, Williams MC. Knowns and unknowns of the alveolus. *Proc Am Thorac Soc.* 2008; 5:778–82. <https://doi.org/10.1513/pats.200803-028HR> PMID:[18757317](https://pubmed.ncbi.nlm.nih.gov/18757317/)
4. de Lange T. Shelterin: the protein complex that shapes and safeguards human telomeres. *Genes Dev.* 2005; 19:2100–10. <https://doi.org/10.1101/gad.1346005> PMID:[16166375](https://pubmed.ncbi.nlm.nih.gov/16166375/)
5. Martínez P, Blasco MA. Telomeric and extra-telomeric roles for telomerase and the telomere-binding proteins. *Nat Rev Cancer.* 2011; 11:161–76. <https://doi.org/10.1038/nrc3025> PMID:[21346783](https://pubmed.ncbi.nlm.nih.gov/21346783/)
6. Olovnikov AM. A theory of marginotomy. The incomplete copying of template margin in enzymic synthesis of polynucleotides and biological significance of the phenomenon. *J Theor Biol.* 1973; 41:181–90. [https://doi.org/10.1016/0022-5193\(73\)90198-7](https://doi.org/10.1016/0022-5193(73)90198-7) PMID:[4754905](https://pubmed.ncbi.nlm.nih.gov/4754905/)
7. Watson JD. Origin of concatemeric T7 DNA. *Nat New Biol.* 1972; 239:197–201. <https://doi.org/10.1038/newbio239197a0> PMID:[4507727](https://pubmed.ncbi.nlm.nih.gov/4507727/)
8. Harley CB, Futcher AB, Greider CW. Telomeres shorten during ageing of human fibroblasts. *Nature.* 1990; 345:458–60. <https://doi.org/10.1038/345458a0> PMID:[2342578](https://pubmed.ncbi.nlm.nih.gov/2342578/)
9. Vera E, Bernardes de Jesus B, Foronda M, Flores JM, Blasco MA. The rate of increase of short telomeres predicts longevity in mammals. *Cell Rep.* 2012; 2:732–7. <https://doi.org/10.1016/j.celrep.2012.08.023> PMID:[23022483](https://pubmed.ncbi.nlm.nih.gov/23022483/)
10. Whittemore K, Vera E, Martínez-Nevado E, Sanpera C, Blasco MA. Telomere shortening rate predicts species life span. *Proc Natl Acad Sci USA.* 2019; 116:15122–7. <https://doi.org/10.1073/pnas.1902452116> PMID:[31285335](https://pubmed.ncbi.nlm.nih.gov/31285335/)



11. Kropski JA, Blackwell TS, Loyd JE. The genetic basis of idiopathic pulmonary fibrosis. *Eur Respir J*. 2015; 45:1717–27.  
<https://doi.org/10.1183/09031936.00163814>  
PMID:25837031
12. Armanios MY, Chen JJ, Cogan JD, Alder JK, Ingersoll RG, Markin C, Lawson WE, Xie M, Vulto I, Phillips JA 3rd, Lansdorp PM, Greider CW, Loyd JE. Telomerase mutations in families with idiopathic pulmonary fibrosis. *N Engl J Med*. 2007; 356:1317–26.  
<https://doi.org/10.1056/NEJMoa066157>  
PMID:17392301
13. Tsakiri KD, Cronkhite JT, Kuan PJ, Xing C, Raghu G, Weissler JC, Rosenblatt RL, Shay JW, Garcia CK. Adult-onset pulmonary fibrosis caused by mutations in telomerase. *Proc Natl Acad Sci USA*. 2007; 104:7552–7.  
<https://doi.org/10.1073/pnas.0701009104>  
PMID:17460043
14. Alder JK, Chen JJ, Lancaster L, Danoff S, Su SC, Cogan JD, Vulto I, Xie M, Qi X, Tudor RM, Phillips JA 3rd, Lansdorp PM, Loyd JE, Armanios MY. Short telomeres are a risk factor for idiopathic pulmonary fibrosis. *Proc Natl Acad Sci USA*. 2008; 105:13051–6.  
<https://doi.org/10.1073/pnas.0804280105>  
PMID:18753630
15. Cronkhite JT, Xing C, Raghu G, Chin KM, Torres F, Rosenblatt RL, Garcia CK. Telomere shortening in familial and sporadic pulmonary fibrosis. *Am J Respir Crit Care Med*. 2008; 178:729–37.  
<https://doi.org/10.1164/rccm.200804-5500C>  
PMID:18635888
16. Piñeiro-Hermida S, Martínez P, Bosso G, Flores JM, Saraswati S, Connor J, Lemaire R, Blasco MA. Consequences of telomere dysfunction in fibroblasts, club and basal cells for lung fibrosis development. *Nat Commun*. 2022; 13:5656.  
<https://doi.org/10.1038/s41467-022-32771-6>  
PMID:36202783
17. Povedano JM, Martinez P, Flores JM, Mulero F, Blasco MA. Mice with Pulmonary Fibrosis Driven by Telomere Dysfunction. *Cell Rep*. 2015; 12:286–99.  
<https://doi.org/10.1016/j.celrep.2015.06.028>  
PMID:26146081
18. Naikawadi RP, Disayabutr S, Mallavia B, Donne ML, Green G, La JL, Rock JR, Looney MR, Wolters PJ. Telomere dysfunction in alveolar epithelial cells causes lung remodeling and fibrosis. *JCI Insight*. 2016; 1:e86704.  
<https://doi.org/10.1172/jci.insight.86704>  
PMID:27699234
19. Alder JK, Barkauskas CE, Limjunyawong N, Stanley SE, Kembou F, Tudor RM, Hogan BL, Mitzner W, Armanios M. Telomere dysfunction causes alveolar stem cell failure. *Proc Natl Acad Sci USA*. 2015; 112:5099–104.  
<https://doi.org/10.1073/pnas.1504780112>  
PMID:25840590
20. Liu T, Gonzalez De Los Santos F, Zhao Y, Wu Z, Rinke AE, Kim KK, Phan SH. Telomerase reverse transcriptase ameliorates lung fibrosis by protecting alveolar epithelial cells against senescence. *J Biol Chem*. 2019; 294:8861–71.  
<https://doi.org/10.1074/jbc.RA118.006615>  
PMID:31000627
21. Povedano JM, Martinez P, Serrano R, Tejera Á, Gómez-López G, Bobadilla M, Flores JM, Bosch F, Blasco MA. Therapeutic effects of telomerase in mice with pulmonary fibrosis induced by damage to the lungs and short telomeres. *Elife*. 2018; 7:e31299.  
<https://doi.org/10.7554/eLife.31299>  
PMID:29378675
22. Childs BG, Durik M, Baker DJ, van Deursen JM. Cellular senescence in aging and age-related disease: from mechanisms to therapy. *Nat Med*. 2015; 21:1424–35.  
<https://doi.org/10.1038/nm.4000>  
PMID:26646499
23. Wang Q, Codd V, Raisi-Estabragh Z, Musicha C, Bountziouka V, Kaptoge S, Allara E, Angelantonio ED, Butterworth AS, Wood AM, Thompson JR, Petersen SE, Harvey NC, et al. Shorter leukocyte telomere length is associated with adverse COVID-19 outcomes: A cohort study in UK Biobank. *EBioMedicine*. 2021; 70:103485.  
<https://doi.org/10.1016/j.ebiom.2021.103485>  
PMID:34304048
24. Verity R, Okell LC, Dorigatti I, Winskill P, Whittaker C, Imai N, Cuomo-Dannenburg G, Thompson H, Walker PGT, Fu H, Dighe A, Griffin JT, Baguelin M, et al. Estimates of the severity of coronavirus disease 2019: a model-based analysis. *Lancet Infect Dis*. 2020; 20:669–77.  
[https://doi.org/10.1016/S1473-3099\(20\)30243-7](https://doi.org/10.1016/S1473-3099(20)30243-7)  
PMID:32240634
25. Sanchez-Vazquez R, Guío-Carrión A, Zapatero-Gaviria A, Martínez P, Blasco MA. Shorter telomere lengths in patients with severe COVID-19 disease. *Aging (Albany NY)*. 2021; 13:1–15.  
<https://doi.org/10.18632/aging.202463>  
PMID:33428591
26. Froidure A, Mahieu M, Hoton D, Laterre PF, Yombi JC, Koenig S, Ghaye B, Defour JP, Decottignies A. Short telomeres increase the risk of severe COVID-19. *Aging (Albany NY)*. 2020; 12:19911–22.  
<https://doi.org/10.18632/aging.104097>  
PMID:33104521

27. Wu F, Zhao S, Yu B, Chen YM, Wang W, Song ZG, Hu Y, Tao ZW, Tian JH, Pei YY, Yuan ML, Zhang YL, Dai FH, et al. A new coronavirus associated with human respiratory disease in China. *Nature*. 2020; 579:265–9. <https://doi.org/10.1038/s41586-020-2008-3> PMID:32015508
28. Wrapp D, Wang N, Corbett KS, Goldsmith JA, Hsieh CL, Abiona O, Graham BS, McLellan JS. Cryo-EM structure of the 2019-nCoV spike in the prefusion conformation. *Science*. 2020; 367:1260–3. <https://doi.org/10.1126/science.abb2507> PMID:32075877
29. Zhao Y, Zhao Z, Wang Y, Zhou Y, Ma Y, Zuo W. Single-Cell RNA Expression Profiling of ACE2, the Receptor of SARS-CoV-2. *Am J Respir Crit Care Med*. 2020; 202:756–9. <https://doi.org/10.1164/rccm.202001-0179LE> PMID:32663409
30. Ambardar SR, Hightower SL, Huprikar NA, Chung KK, Singhal A, Collen JF. Post-COVID-19 Pulmonary Fibrosis: Novel Sequelae of the Current Pandemic. *J Clin Med*. 2021; 10:2452. <https://doi.org/10.3390/jcm10112452> PMID:34205928
31. Flores I, Canela A, Vera E, Tejera A, Cotsarelis G, Blasco MA. The longest telomeres: a general signature of adult stem cell compartments. *Genes Dev*. 2008; 22:654–67. <https://doi.org/10.1101/gad.451008> PMID:18283121
32. Canela A, Vera E, Klatt P, Blasco MA. High-throughput telomere length quantification by FISH and its application to human population studies. *Proc Natl Acad Sci USA*. 2007; 104:5300–5. <https://doi.org/10.1073/pnas.0609367104> PMID:17369361
33. Cawthon RM. Telomere length measurement by a novel monochrome multiplex quantitative PCR method. *Nucleic Acids Res*. 2009; 37:e21. <https://doi.org/10.1093/nar/gkn1027> PMID:19129229
34. Epel ES, Blackburn EH, Lin J, Dhabhar FS, Adler NE, Morrow JD, Cawthon RM. Accelerated telomere shortening in response to life stress. *Proc Natl Acad Sci USA*. 2004; 101:17312–5. <https://doi.org/10.1073/pnas.0407162101> PMID:15574496
35. Valdes AM, Andrew T, Gardner JP, Kimura M, Oelsner E, Cherkas LF, Aviv A, Spector TD. Obesity, cigarette smoking, and telomere length in women. *Lancet*. 2005; 366:662–4. [https://doi.org/10.1016/S0140-6736\(05\)66630-5](https://doi.org/10.1016/S0140-6736(05)66630-5) PMID:16112303
36. Ding Y, He L, Zhang Q, Huang Z, Che X, Hou J, Wang H, Shen H, Qiu L, Li Z, Geng J, Cai J, Han H, et al. Organ distribution of severe acute respiratory syndrome (SARS) associated coronavirus (SARS-CoV) in SARS patients: implications for pathogenesis and virus transmission pathways. *J Pathol*. 2004; 203:622–30. <https://doi.org/10.1002/path.1560> PMID:15141376
37. Tian S, Hu W, Niu L, Liu H, Xu H, Xiao SY. Pulmonary Pathology of Early-Phase 2019 Novel Coronavirus (COVID-19) Pneumonia in Two Patients With Lung Cancer. *J Thorac Oncol*. 2020; 15:700–4. <https://doi.org/10.1016/j.jtho.2020.02.010> PMID:32114094
38. Wang D, Hu B, Hu C, Zhu F, Liu X, Zhang J, Wang B, Xiang H, Cheng Z, Xiong Y, Zhao Y, Li Y, Wang X, Peng Z. Clinical Characteristics of 138 Hospitalized Patients With 2019 Novel Coronavirus-Infected Pneumonia in Wuhan, China. *JAMA*. 2020; 323:1061–9. <https://doi.org/10.1001/jama.2020.1585> PMID:32031570
39. Young BE, Ong SWX, Kalimuddin S, Low JG, Tan SY, Loh J, Ng OT, Marimuthu K, Ang LW, Mak TM, Lau SK, Anderson DE, Chan KS, et al, and Singapore 2019 Novel Coronavirus Outbreak Research Team. Epidemiologic Features and Clinical Course of Patients Infected With SARS-CoV-2 in Singapore. *JAMA*. 2020; 323:1488–94. <https://doi.org/10.1001/jama.2020.3204> PMID:32125362
40. Wynn TA, Ramalingam TR. Mechanisms of fibrosis: therapeutic translation for fibrotic disease. *Nat Med*. 2012; 18:1028–40. <https://doi.org/10.1038/nm.2807> PMID:22772564
41. Jackson CB, Farzan M, Chen B, Choe H. Mechanisms of SARS-CoV-2 entry into cells. *Nat Rev Mol Cell Biol*. 2022; 23:3–20. <https://doi.org/10.1038/s41580-021-00418-x> PMID:34611326
42. Grillo F, Barisione E, Ball L, Mastracci L, Fiocca R. Lung fibrosis: an undervalued finding in COVID-19 pathological series. *Lancet Infect Dis*. 2021; 21:e72. [https://doi.org/10.1016/S1473-3099\(20\)30582-X](https://doi.org/10.1016/S1473-3099(20)30582-X) PMID:32735785
43. Carsana L, Sonzogni A, Nasr A, Rossi RS, Pellegrinelli A, Zerbi P, Rech R, Colombo R, Antinori S, Corbellino M, Galli M, Catena E, Tosoni A, et al. Pulmonary post-mortem findings in a series of COVID-19 cases from northern Italy: a two-centre descriptive study. *Lancet Infect Dis*. 2020; 20:1135–40. [https://doi.org/10.1016/S1473-3099\(20\)30434-5](https://doi.org/10.1016/S1473-3099(20)30434-5) PMID:32526193
44. Fox SE, Akmatbekov A, Harbert JL, Li G, Quincy Brown J, Vander Heide RS. Pulmonary and cardiac pathology in African American patients with COVID-19: an

- autopsy series from New Orleans. *Lancet Respir Med*. 2020; 8:681–6.  
[https://doi.org/10.1016/S2213-2600\(20\)30243-5](https://doi.org/10.1016/S2213-2600(20)30243-5)  
PMID:[32473124](https://pubmed.ncbi.nlm.nih.gov/32473124/)
45. Schwensen HF, Borreschmidt LK, Storgaard M, Redsted S, Christensen S, Madsen LB. Fatal pulmonary fibrosis: a post-COVID-19 autopsy case. *J Clin Pathol*. 2020. [Epub ahead of print].  
<https://doi.org/10.1136/jclinpath-2020-206879>  
PMID:[32723800](https://pubmed.ncbi.nlm.nih.gov/32723800/)
46. Piñeiro-Hermida S, Autilio C, Martínez P, Bosch F, Pérez-Gil J, Blasco MA. Telomerase treatment prevents lung profibrotic pathologies associated with physiological aging. *J Cell Biol*. 2020; 219:e202002120.  
<https://doi.org/10.1083/jcb.202002120>  
PMID:[32777016](https://pubmed.ncbi.nlm.nih.gov/32777016/)
47. Snetselaar R, van Batenburg AA, van Oosterhout MFM, Kazemier KM, Roothaan SM, Peeters T, van der Vis JJ, Goldschmeding R, Grutters JC, van Moorsel CH. Short telomere length in IPF lung associates with fibrotic lesions and predicts survival. *PLoS One*. 2017; 12:e0189467.  
<https://doi.org/10.1371/journal.pone.0189467>  
PMID:[29281671](https://pubmed.ncbi.nlm.nih.gov/29281671/)
48. Martínez P, Blasco MA. Telomere-driven diseases and telomere-targeting therapies. *J Cell Biol*. 2017; 216:875–87.  
<https://doi.org/10.1083/jcb.201610111>  
PMID:[28254828](https://pubmed.ncbi.nlm.nih.gov/28254828/)
49. Yong SJ. Long COVID or post-COVID-19 syndrome: putative pathophysiology, risk factors, and treatments. *Infect Dis (Lond)*. 2021; 53:737–54.  
<https://doi.org/10.1080/23744235.2021.1924397>  
PMID:[34024217](https://pubmed.ncbi.nlm.nih.gov/34024217/)
50. Gonzalo S, Jaco I, Fraga MF, Chen T, Li E, Esteller M, Blasco MA. DNA methyltransferases control telomere length and telomere recombination in mammalian cells. *Nat Cell Biol*. 2006; 8:416–24.  
<https://doi.org/10.1038/ncb1386>  
PMID:[16565708](https://pubmed.ncbi.nlm.nih.gov/16565708/)

## SUPPLEMENTARY MATERIALS

### Supplementary Figures

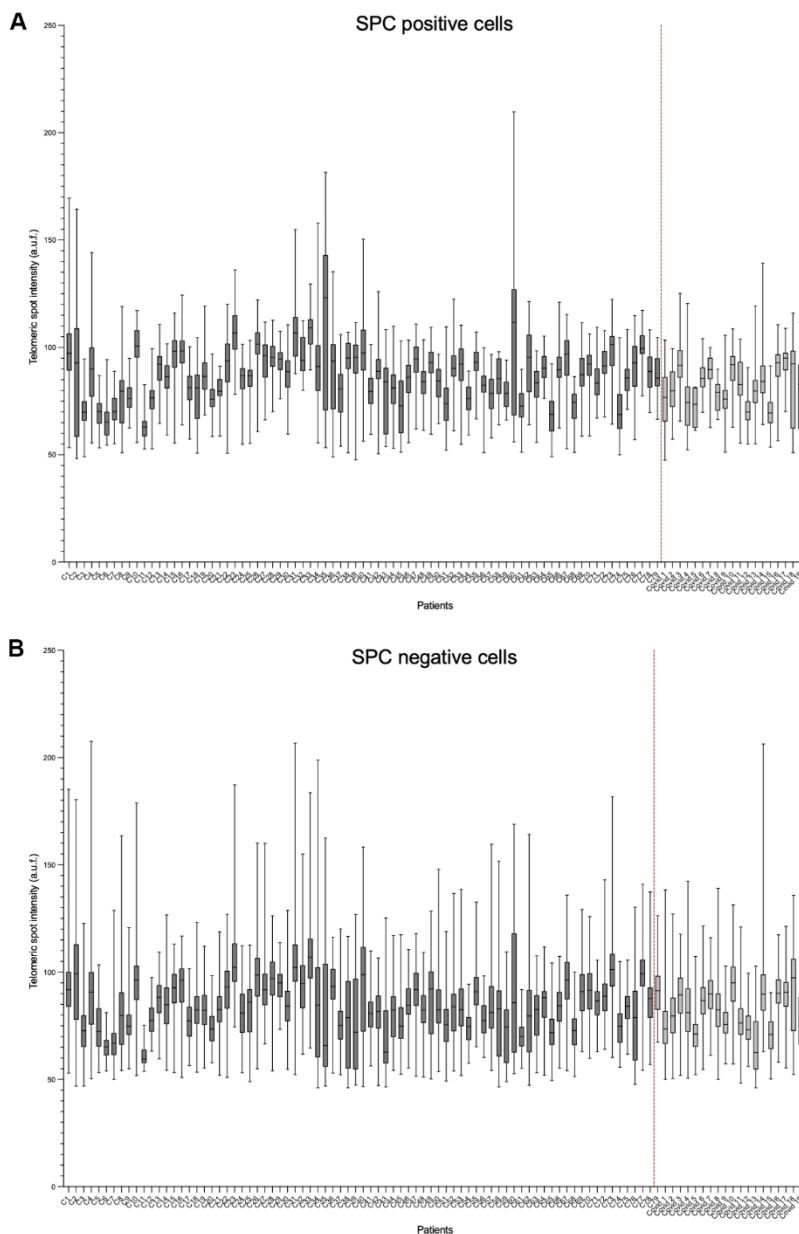

**Supplementary Figure 1. Distribution of mean telomeric spot intensity per nucleus in lung tissue sections from controls and from COVID-19 patients. (A, B)** Box and Whisker plot representation of mean telomeric spot intensity per nucleus in alveolar type II cells (AT2) pro-SPC positive (A) and in non-AT2 cells pro-SPC negative (B) in lung sections of control and COVID-19 patients. The ends of the box are the upper and lower quartiles so that the box spans the interquartile range. The middle line represents the median and bars the standard deviation.
